# Supplementary material for: Exercise-Induced Cardiac Troponin Elevations: From Underlying Mechanisms to Clinical Relevance
Source: PubMed Central journal article supplement — Circulation. 2021 Dec 14;144(24):1955–72. doi: 10.1161/CIRCULATIONAHA.121.056208 (PMC8663527; doi:10.1161/circulationaha.121.056208), 2021-12-14
Supplement: cir-144-1955-s001.pdf [file cir-144-1955-s001.pdf]

SUPPLEMENTAL MATERIAL TO

**Exercise-induced Cardiac Troponin Elevations:  
*from underlying mechanisms to clinical relevance***

RUNNING TITLE: Exercise and Cardiac Troponins

Vincent L. Aengevaeren, MD PhD<sup>a,b</sup>

Aaron L. Baggish, MD<sup>c</sup>

Eugene H. Chung, MD<sup>d</sup>

Keith George, PhD<sup>e</sup>

Øyunn Kleiven, MD PhD<sup>f</sup>

Alma M.A. Mingels, PhD<sup>g</sup>

Stein Ørn, MD PhD<sup>f,h</sup>

Rob E. Shave, PhD<sup>i</sup>

Paul D. Thompson, MD<sup>j</sup>

Thijs M.H. Eijsvogels, PhD<sup>a</sup>

Radboud Institute for Health Sciences, Departments of Physiology<sup>a</sup> and Cardiology<sup>b</sup>, Radboud University Medical Center, Nijmegen, The Netherlands. <sup>c</sup>Cardiovascular Performance Program, Massachusetts General Hospital, Boston, MA, USA. <sup>d</sup>Michigan Medicine, University of Michigan, Ann Arbor, MI, USA. <sup>e</sup>Research Institute for Sport and Exercise Sciences, Liverpool John Moores University, Liverpool, UK. <sup>f</sup>Cardiology Department, Stavanger University Hospital, Stavanger, Norway. <sup>g</sup>Department of Clinical Chemistry, Central Diagnostic Laboratory, Maastricht University Medical Center Maastricht, the Netherlands. <sup>h</sup> Department of Electrical Engineering and Computer Science, University of Stavanger, Stavanger, Norway. <sup>i</sup>Centre for Heart, Lung and Vascular Health, School of Health and Exercise Sciences, University of British Columbia, Canada <sup>j</sup>Division of Cardiology, Hartford Hospital, Hartford, CT, USA

**Address for correspondence:**

Dr. Thijs Eijsvogels, Department of Physiology (392), Radboud university medical center, P.O. Box 9101, 6500 HB Nijmegen, The Netherlands,  
Tel +31 24 36 13 674, Fax +31 24 36 16413,  
E-mail: Thijs.Eijsvogels@radboudumc.nl

**Supplemental Table 1:** Overview of studies that sampled cTnT  $\geq 3$  times between 0-72h following exercise. Median cTnT concentrations are reported, with the maximal median value of each study highlighted in bold text.

| Author, year                  | Study population                                                                                                                  | Type of exercise         | Assay                                                  | cTnT pre-exercise | cTnT +0h   | cTnT +1h | cTnT +2-4h | cTnT +5-6h | cTnT +7-23h | cTnT +24-47h | cTnT +48-72h |
|-------------------------------|-----------------------------------------------------------------------------------------------------------------------------------|--------------------------|--------------------------------------------------------|-------------------|------------|----------|------------|------------|-------------|--------------|--------------|
| Tian, 2006 <sup>95</sup>      | N=10<br>100% male<br>16.2±0.6 yrs<br>CVD/CVRF na<br>Junior long-distance runners at national level                                | 21-km treadmill exercise | cTnT (3. generation, Roche Diagnostics)<br>URL 30 ng/L | 5                 |            |          | <b>75</b>  | 70         |             | 6            |              |
| Middleton, 2006 <sup>96</sup> | N=14<br>93 % male<br>29±5 yrs<br>0% self-reported CVD<br>CVRF na<br>Marathon runners with 0-16 previous marathon competitions     | Marathon                 | cTnT (3. generation, Roche Diagnostics)<br>URL 10 ng/L | 0                 | 0          | 0        | 0          | 0          | 10          | <b>20</b>    |              |
| Frassl, 2008 <sup>97</sup>    | N=15<br>0% male<br>37 (28-39) yrs<br>0% self-reported CVD<br>CVRF na<br>Marathon runners with 0-10 previous marathon competitions | Marathon                 | cTnT (3. generation, Roche Diagnostics)<br>URL 10 ng/L | 0                 | <b>32</b>  |          |            |            |             | 0            | 0            |
| Nie, 2008 <sup>98</sup>       | N=10<br>100% male<br>15.0±0.7 yrs<br>0% CVD by clinical assessment<br>CVRF na<br>Junior basketball players, 14h training per week | Basketball game          | cTnT (3. generation, Roche Diagnostics)<br>URL 30 ng/L | 5                 | 5          |          | <b>5</b>   |            |             | 5            |              |
| Lippi, 2010 <sup>99</sup>     | N=9<br>100% male<br>25±3 yYrs<br>0% CVD (method of assessment na)                                                                 | Downhill walking 40 min  | cTnT (Roche Diagnostics)<br>URL 14 ng/L                | 5.1               | <b>5.8</b> |          |            |            |             | 5.2          | 5.1          |

|                             | Previous training characteristics na                                                                                                                                                                       |                                    |                                                        |     |             |       |              |       |      |
|-----------------------------|------------------------------------------------------------------------------------------------------------------------------------------------------------------------------------------------------------|------------------------------------|--------------------------------------------------------|-----|-------------|-------|--------------|-------|------|
| Scherr, 2011 <sup>100</sup> | N=102<br>100% male<br>42±9.5 yrs<br>CVRF: 45 % had family history of CVD, 15 % had hypercholesterolemia, 16% had hypertension, 3% current smokers<br>Marathon runners, 0-66 previous marathon competitions | Marathon, 2009                     | cTnT (Roche diagnostics)<br>URL 14 ng/L                | 3.3 | <b>31.1</b> |       |              | 9.3   | 3.6  |
| Nie, 2011 <sup>101</sup>    | N=12<br>100% male<br>16.2±0.6 yrs<br>0% CVD by clinical assessment<br>CVRF na<br>National level long-distance junior runners, VO2 max 59.5±5.3 mL/kg/min                                                   | Half-marathon                      | cTnT (3. generation, Roche Diagnostics)<br>URL 10 ng/L | 5   |             | 65    | <b>100</b>   |       | 5    |
| Tian, 2012 <sup>102</sup>   | N=13<br>100% male<br>24.0±3.6 yrs<br>0% CVD by clinical assessment<br>CVRF na<br>Recreational runners, VO2 max 54.7±3.0 mL/kg/min                                                                          | 90 min treadmill run (adults)      | cTnT (Roche Diagnostics)<br>URL 14 ng/L                | 5   | 9.30        | 13.30 | <b>19.10</b> | 16.70 | 4.0  |
|                             | N=13<br>100% male<br>14.1±1.1 yrs<br>0% CVD by clinical assessment<br>CVRF na<br>Recreational runners, VO2 max 57.5 mL/kg/min                                                                              | 90 min treadmill run (adolescents) | cTnT (Roche Diagnostics)<br>URL 14 ng/L                | 3   | 18.4        | 81    | <b>211</b>   | 141   | 24.7 |
| Ma, 2014 <sup>103</sup>     | N=28<br>100% male children<br>7.2±1.1 yrs                                                                                                                                                                  | Table tennis                       | cTnT (3. generation, Roche Diagnostics)<br>URL 30 ng/L | 5   | 23          |       | <b>26</b>    |       | 021  |

|                                  |                                                                                                                                               |                                    |                                         |      |     |      |             |             |     |     |  |
|----------------------------------|-----------------------------------------------------------------------------------------------------------------------------------------------|------------------------------------|-----------------------------------------|------|-----|------|-------------|-------------|-----|-----|--|
|                                  | 0% self-reported CVD/CVRF<br>Amateur table tennis players<br>with 0.5-1yr training<br>experience                                              |                                    |                                         |      |     |      |             |             |     |     |  |
| Legaz-Arrese, 2015 <sup>33</sup> | N=15<br>100% male<br>35±9 yrs<br>0% CVD by clinical assessment<br>CVRF na<br>Triathletes with mean 8h<br>training per week                    | 60 min swimming                    | cTnT (Roche Diagnostics)<br>URL 14 ng/L | 4.2  | 7.2 | 11.1 | <b>18.9</b> | 16.5        | 9.7 | 6.0 |  |
|                                  | N=15<br>100% male<br>35±9 yrs<br>0% CVD by clinical assessment<br>CVRF na<br>Triathletes with mean 8h<br>training pr week                     | 60 min cycling                     | cTnT (Roche Diagnostics)<br>URL 14 ng/L | 4.3  | 6.0 | 10.1 | <b>16.8</b> | 10.6        | 8.2 | 5.6 |  |
|                                  | N=15<br>100% male<br>35±9 yrs<br>0% CVD by clinical assessment<br>CVRF na<br>Triathletes with mean 8h<br>training pr week                     | 60 min running                     | cTnT (Roche Diagnostics)<br>URL 14 ng/L | 4.1  | 6.9 | 10.4 | <b>19.1</b> | 16.7        | 9.5 | 6.3 |  |
| Li, 2016 <sup>104</sup>          | N=10<br>100% male<br>22.1±2.6 yrs<br>0% self-reported CVD/CVRF<br>Marathon runners, VO2 max<br>64.7±5.6 mL/kg/min                             | Normoxic, intermittent<br>exercise | cTnT (Roche Diagnostics)<br>URL 14 ng/L | 5.2  | 9.8 |      | 20.3        | <b>21.0</b> |     | 6.4 |  |
| Li, 2016 <sup>105</sup>          | N=9<br>100% male<br>21.7±2.3 yrs<br>0% CVD, CVRF na<br>VO2 max 64.3±6.7 mL/kg/min<br>Marathon runners, training<br>volume of 51.1±3.3 km/week | Normoxic, intermittent<br>exercise | cTnT (Roche Diagnostics)<br>URL 14 ng/L | 5.44 | 9.8 |      | 23.6        | <b>23.8</b> |     | 6.6 |  |

|                                   |                                                                                                                                                               |                                           |                                         |     |             |             |             |     |     |         |
|-----------------------------------|---------------------------------------------------------------------------------------------------------------------------------------------------------------|-------------------------------------------|-----------------------------------------|-----|-------------|-------------|-------------|-----|-----|---------|
| Klinkenberg, 2016 <sup>106</sup>  | N=25<br>76% male<br>40±13 yrs<br>0% self-reported CVD<br>CVRF na<br>56% had prior marathon or ultra-marathon experience, median training volume of 7h pr week | 30-km run                                 | cTnT (Roche Diagnostics)<br>URL 14 ng/L | 6.0 | 37.0        | <b>45.0</b> | 40.0        |     |     |         |
| Legaz-Arrese, 2017 <sup>107</sup> | N=16<br>44% males<br>31.1±7.9 yrs<br>0% CVD by clinical assesemnt<br>CVRF na<br>Swimmers, training volume: 14.6±9.5 h/week                                    | High-intensity swimming exercise (adults) | cTnT (Roche Diagnostics)<br>URL 14 ng/L | 3.0 | 3.0         | 6.0         | <b>12.5</b> | 7.1 | 3.5 | 3.0     |
| Li, 2017 <sup>108</sup>           | N=21<br>Sex distribution na<br>22.9±4.5 yrs<br>0% CVD/CVRF by clinical assessment<br>Experienced marathon runners, VO2 max 63.3±5.6 mL/kg/min                 | High-intensity interval exercise          | cTnT (Roche Diagnostics)<br>URL 14 ng/L | 5.0 | 10.0        | <b>25.6</b> |             |     |     | 6.6     |
| Vassalle, 2018 <sup>109</sup>     | N=18<br>83% male<br>46±6 yrs<br>0% self-reported CVD<br>CVRF na<br>Training volume of 3-7 sessions pr week                                                    | 21-km run                                 | cTnT (Roche Diagnostics)<br>URL 14 ng/L | 5.0 | <b>11.0</b> |             |             |     |     | 6.0 4.0 |
| Broz, 2018 <sup>110</sup>         | N=19<br>100% male<br>37 (24-48) yrs<br>0% self-reported CVD/CVRF<br>Marathon runners, VO2 max 59.7 (36.9-75.3) mL/kg/min                                      | 2h treadmill run                          | cTnT (Roche Diagnostcs)<br>URL 14 ng/L  | 7.2 | 14.8        | <b>18.5</b> |             |     |     | 8.7     |
| Skadberg, 2018 <sup>111</sup>     | N=97                                                                                                                                                          | 91-km cycling event                       | cTnT (Roche Diagnostics)                | 4.1 | <b>40.9</b> |             | 37.4        |     |     | 12.2    |

|                                       |                                                                                                                                                                                       |                                                                |                                         |     |             |      |             |      |      |
|---------------------------------------|---------------------------------------------------------------------------------------------------------------------------------------------------------------------------------------|----------------------------------------------------------------|-----------------------------------------|-----|-------------|------|-------------|------|------|
|                                       | 76% male<br>42.8±9.6 yrs<br>0% self-reported CVD, CVRF:<br>36% with fam history of CVD,<br>4% smokers, 40 % prior<br>smokers. Recreational cyclists,<br>7 (5-10) hours of training/wk |                                                                | URL 14 ng/L                             |     |             |      |             |      |      |
| Martinez-Navarro, 2020 <sup>112</sup> | N=98<br>85% male<br>38.7±3.6 yrs<br>0% CVD (assessment strategy<br>na)<br>CVRF na<br>Previous marathon<br>experience, VO2 max:<br>54.5±5.6 mL/kg/min                                  | Marathon                                                       | cTnT (Roche Diagnostics)<br>URL 14 ng/L | 5.7 | <b>50.4</b> |      |             | 15.6 | 11.5 |
| Li, 2020 <sup>113</sup>               | N=12<br>92% male<br>23.5±5.5 yrs<br>0% self-reported CVD/CVRF<br>Endurance runners, VO2 max<br>62.4±5.4 mL/kg/min                                                                     | Intermittent exercise for 92<br>min                            | cTnT (Roche Diagnostics)<br>URL 14 ng/L | 5.0 | 14.0        | 23.0 | <b>36.0</b> | 7.5  | 6.0  |
|                                       | N=12<br>92% male<br>23.5±5.5 yrs<br>0% self-reported CVD/CVRF<br>Endurance runners, VO2 max<br>62.4±5.4 mL/kg/min                                                                     | Continuous exercise for 92<br>min                              | cTnT (Roche Diagnostics)<br>URL 14 ng/L | 4.0 | 9.0         | 18.5 | <b>34.5</b> | 7.0  | 6.5  |
| Nie, 2020 <sup>114</sup>              | N=17<br>0% male<br>Age na<br>CVD/CVRF na<br>Training experience na                                                                                                                    | Moderate intensity<br>continous exercise (follicular<br>phase) | cTnT (Roche Diagnostics)<br>URL 14 ng/L | 3.0 | 3.1         | 4.1  | <b>4.3</b>  |      |      |
|                                       | N=17<br>0% male<br>Age na<br>CVD/CVRF na<br>Training experience na                                                                                                                    | Moderate intensity<br>continous exercise (luteal<br>phase)     | cTnT (Roche Diagnostics)<br>URL 14 ng/L | 2.7 | 2.8         | 3.7  | <b>3.8</b>  |      |      |

|                                   |                                                                                                                                                                                                         |                                                     |                                         |     |             |      |             |           |
|-----------------------------------|---------------------------------------------------------------------------------------------------------------------------------------------------------------------------------------------------------|-----------------------------------------------------|-----------------------------------------|-----|-------------|------|-------------|-----------|
|                                   | N=17<br>0% male<br>Age na<br>CVD/CVRF na<br>Training experience na                                                                                                                                      | High-intensity interval exercise (follicular phase) | cTnT (Roche Diagnostics)<br>URL 14 ng/L | 3.0 | 3.5         | 6.0  | <b>8.2</b>  |           |
|                                   | N=17<br>0% male<br>Age na<br>CVD/CVRF na<br>Training experience na                                                                                                                                      | High-intensity interval exercise (luteal phase)     | cTnT (Roche Diagnostics)<br>URL 14 ng/L | 2.4 | 2.9         | 4.7  | <b>6.5</b>  |           |
| Huang, 2020 <sup>115</sup>        | N=14<br>0% male<br>Age na<br>CVD/CVRF na                                                                                                                                                                | High-intensity interval exercise                    | cTnT (Roche Diagnostics)<br>URL 14 ng/L | 1.5 | 3.8         |      | <b>7.0</b>  | 7.2       |
|                                   | N=14<br>0% male<br>Age na<br>CVD/CVRF na                                                                                                                                                                | Moderate-intensity continuous exercise              | cTnT (Roche Diagnostics)<br>URL 14 ng/L | 1.5 | 2.6         |      | <b>13.8</b> | 4.2       |
| Bernat-Adell, 2021 <sup>116</sup> | N=86<br>86% male<br>38.6±3.6 yrs<br>0% self-reported CVD<br>CVRF na<br>Previous marathon completed at <4/4.5hrs for male/female subjects                                                                | Marathon                                            | cTnT (Roche Diagnostics)<br>URL 14 ng/L | 5.6 | <b>48.4</b> |      |             | 15.4 11.3 |
| Aengevaeren, 2021 <sup>117</sup>  | N=11<br>100% males<br>51 (50-56) Yrs<br>0% CVD/CVRF by clinical assessment<br>Previous marathon experience (2-25 marathons),<br>22 [16-38] average lifelong<br>Metabolic Equivalent of Task-hours/week. | Marathon                                            | cTnT (Roche Diagnostics)<br>URL 14 ng/L | 5.5 |             | 31.5 | <b>36.4</b> | 9.4       |

cTnT, cardiac troponin T; na, not available from publication.

**Supplemental Table 2:** Overview of studies that sampled cTnI  $\geq 3$  times between 0-72h following exercise. Median cTnI concentrations are reported, with the maximal median value of each study highlighted in bold text.

| Author, year               | N                                                                                                                                                     | Type of exercise         | Assay                                                           | cTnI pre-exercise | cTnI +0h   | cTnI +1h | cTnI +2-4h | cTnI +5-6h | cTnI +7-23h | cTnI +24-47h | cTnI +48-72h |
|----------------------------|-------------------------------------------------------------------------------------------------------------------------------------------------------|--------------------------|-----------------------------------------------------------------|-------------------|------------|----------|------------|------------|-------------|--------------|--------------|
| Tian, 2006 <sup>95</sup>   | N=10<br>100% male<br>16.2±0.6 yrs<br>CVRF na<br>Junior long-distance runners at national level                                                        | 21-km treadmill exercise | cTnI (AccuTnI, Beckman Coulter)<br>URL 80 ng/L                  | 23                |            |          | 117        | <b>184</b> |             | 44           |              |
| Frassl, 2008 <sup>97</sup> | N=15<br>0% male<br>37 (28-39) yrs<br>0% self-reported CVD<br>CVRF na<br>Marathon-runners with 0-10 previous marathon competitions                     | Marathon                 | cTnI (ADVIA centaur assay, BayerHealthcare)<br>URL 100 ng/L     | 0                 | <b>98</b>  |          |            |            |             | 0            | 0            |
| Lippi, 2008 <sup>118</sup> | N=10<br>47 (range: 38-52) yrs<br>0% CVD (assessment strategy na)<br>CVRF na<br>Engaged in specific endurance training > 5 yrs, VO2 max 58±4 mL/kg/min | Half-marathon            | cTnI (Evidence Investigators, Randox Laboratories)<br>URL na    | 0                 | 0          |          | 0          | 0          |             | 0            |              |
| Nie, 2008 <sup>98</sup>    | N=10<br>100% male<br>15.0±0.7 yrs<br>0% CVD by clinical assessment<br>CVRF na<br>Junior basketball players, 14h training pr week                      | Basketball game          | cTnI (AccuTnI, Beckman Coulter)<br>URL 60 ng/L                  | 12                | 18         |          | <b>24</b>  |            |             | 24           |              |
| Lippi, 2010 <sup>99</sup>  | N=9<br>100% male<br>25±3 yrs<br>0% CVD (assessment strategy na)<br>Previous training characteristics na                                               | Downhill walking 40 min  | cTnI (ADVIA Centaur immunoassay system, Siemens)<br>URL 40 ng/L | 5.6               | <b>5.8</b> |          |            |            |             | 5.7          | 5.2          |



|                                      |                                                                                                                                                             |                      |                                                |      |           |    |           |             |    |           |
|--------------------------------------|-------------------------------------------------------------------------------------------------------------------------------------------------------------|----------------------|------------------------------------------------|------|-----------|----|-----------|-------------|----|-----------|
| Nie, 2011 <sup>101</sup>             | N=12<br>100% male<br>16.2±0.6 yrs<br>0% CVD by clinical assessment<br>CVRF na<br>National level long-distance junior runners,<br>VO2 max 59.5±5.3 mL/kg/min | Half-marathon        | cTnI (AccuTnI, Beckman Coulter)<br>URL na ng/L | 20   |           |    | 130       | <b>195</b>  |    | 45        |
| Carranza-Garcia, 2011 <sup>119</sup> | N=18<br>24±3 yrs<br>CVD/CVRF na<br>3 weight-lifting session pr week                                                                                         | Weithlifting session | cTnI (AccuTnI, Beckman Coulter)<br>URL 40 ng/L | 24   | 12        | 14 | 19        | 18          | 18 | <b>20</b> |
|                                      | N=12<br>100% male<br>24±4 yrs<br>CVD/CVRF na<br>Soccer players, VO2 max 56.3±4.0<br>mL/kg/min                                                               | Indoor soccer match  | cTnI (AccuTnI, Beckman Coulter)<br>URL 40 ng/L | 38   | 36        | 31 | 37        | <b>42</b>   | 35 | 33        |
|                                      | N=12<br>0% male<br>24±4 yrs<br>CVD/CVRF na<br>Soccer players, VO2 max 47.6±3.3<br>mL/kg/min                                                                 | Indoor soccer match  | cTnI (AccuTnI, Beckman Coulter)<br>URL 40 ng/L | 12   | 8         | 9  | <b>15</b> | 13          | 14 | 11        |
| Lippi, 2012 <sup>120</sup>           | N=17<br>100% male<br>47 (range: 37-64) yrs<br>0% CVD (method of assessment na)<br>CVRF na<br>Experience with endurance training, VO2<br>max 65±5 mL/kg/min  | Half-marathon        | cTnI (HS-AccuTnI)<br>URL 8.6 ng/L              | 2.90 | 4.8       |    | 9.0       | <b>12.3</b> |    | 4.5       |
| Ma, 2014 <sup>103</sup>              | N=28<br>100% male children<br>7.2±1.1 yrs<br>0% self-reported CVD/CVRF<br>Amateur table tennis players with 0.6-1yr<br>training experience                  | Table tennis         | cTnI (AccuTnI, Beckman Coulter)<br>URL 60 ng/L | 20   | <b>55</b> |    | 54        |             |    | 55        |

|                                  |                                                                                                                                                                      |                                            |                                                                      |     |           |      |             |           |    |    |
|----------------------------------|----------------------------------------------------------------------------------------------------------------------------------------------------------------------|--------------------------------------------|----------------------------------------------------------------------|-----|-----------|------|-------------|-----------|----|----|
| Carmona, 2015 <sup>121</sup>     | N=17, however only 8 subjects completed the study<br>88% of finishers were male<br>Age na<br>CVD/CVRF na<br>Experienced nonprofessional endurance runners            | 85-km running                              | cTnI (Siemens Healthcare Diagnostics)<br>URL na                      | 18  | <b>67</b> |      |             |           |    | 0  |
| Li, 2016 <sup>105</sup>          | N=9<br>100% male<br>21.7±2.3 yrs<br>0% CVD by clinical assessment<br>CVRF na<br>Marathon runners, training volume of 51.1±3.3 km/week;<br>VO2 max 64.3±6.7 mL/kg/min | Intermittent exercise (normoxic condition) | cTnI (AccuTnI, Beckman Coulter)<br>URL 40 ng/L                       | 10  | 10        | 20   | <b>30</b>   |           |    | 10 |
| Klinkenberg, 2016 <sup>106</sup> | N=25<br>76% male<br>40±13 yrs<br>0% self-reported CVD<br>CVRF na<br>56% had prior marathon or ultra-marathon experience, median training volume of 7h per week       | 30-km run                                  | cTnI (STAT high-sensitiv assay, Abbott Diagnostics)<br>URL 26.2 ng/L | 6.0 | 30.0      | 49.0 | <b>67.0</b> |           |    |    |
|                                  | N=25<br>76% male<br>40±13 yrs<br>0% self-reported CVD<br>CVRF na<br>56% had prior marathon or ultra-marathon experience, median training volume of 7h pr week        | 30-km run                                  | cTnI (Access AccuTnI+3, Beckman Coulter)<br>URL 40 ng/L              | 5.0 | 37.0      | 60.0 | <b>80.0</b> |           |    |    |
| Lopez-Laval, 2016 <sup>122</sup> | N=12<br>100% male<br>37.3±4.1 yrs<br>0% CVD by clinical assessment<br>CVRF na<br>Adult elite athletes, VO2 max 58±3 mL/kg/min                                        | Basketball game                            | cTnI (Access AccuTnI, Beckmann Coulter)<br>URL 40 ng/L               | 9   | 18        | 30   | 45          | <b>47</b> | 33 | 13 |

|                               |                                                                                                                                                                                                                       |                     |                                                                 |     |            |            |    |             |     |      |
|-------------------------------|-----------------------------------------------------------------------------------------------------------------------------------------------------------------------------------------------------------------------|---------------------|-----------------------------------------------------------------|-----|------------|------------|----|-------------|-----|------|
|                               | N=12<br>100% male<br>29.6±2.9 yrs<br>0% CVD by clinical assessment<br>CVRF na<br>Adult amateur athletes, VO2 max 56±7 mL/kg/min                                                                                       | Basketball game     | cTnI (Access AccuTnI, Beckmann Coulter)<br>URL 40 ng/L          | 3   | 4          | 7          | 13 | <b>16</b>   | 7   | 4    |
|                               | N=12<br>100% male<br>16.6±0.9 yrs<br>0% CVD by clinical assessment<br>CVRF na<br>Junior elite athletes, VO2 max 58±3 mL/kg/min                                                                                        | Basketball game     | cTnI (Access AccuTnI, Beckmann Coulter)<br>URL 40 ng/L          | 11  | 12         | 23         | 39 | <b>52</b>   | 45  | 29   |
| Skadberg, 2017 <sup>123</sup> | N=97<br>76% male<br>42.8±9.6 yrs<br>0% self-reported CVD<br>CVRF: 36 % with family history of CVD, 4 % current smokers, 40 % prior smokers<br>Recreational cyclists, 7 (5-10) hours of training pr week prior to race | 91-km cycling event | cTnI (STAT assay, Abbott Diagnostics)<br>URL 30 ng/L            | 3.4 | 50.5       |            |    | <b>69.3</b> |     | 14.2 |
| Vassalle, 2018 <sup>109</sup> | N=18<br>83% male<br>46±6 yrs<br>0% self-reported CVD<br>CVRF na<br>Training volume of 3-7 sessions per week                                                                                                           | 21-km run           | cTnI (STAT High Sensitive, Abbott Diagnostics)<br>URL 26.2 ng/L | 6.0 | <b>7.0</b> |            |    |             | 7.0 | 4.0  |
| Broz, 2018 <sup>110</sup>     | N=19<br>100% male<br>37 (24-48) yrs<br>0% self-reported CVD/CVRF<br>Marathon runners, VO2 max 59.7 (36.9-75.3) mL/kg/min                                                                                              | 2h treadmill run    | cTnI (STAT High Sensitive, Abbott Diagnostics)<br>URL 19.3 ng/L | 3.4 | 5.6        | <b>8.0</b> |    |             |     | 4.7  |
| Park, 2018 <sup>124</sup>     | N=11<br>100% male<br>51.7±4.4 yrs<br>CVD/CVRF na                                                                                                                                                                      | 100-km run          | cTnI (ADVIA Centaur, Siemens Healthcare)<br>URL 78 ng/L         | 6   | <b>10</b>  |            |    |             | 5   | 6    |

Completed at least one 100km ultramarathon, VO2 max 51.0±4.7 mL/kg/min

|                                  |                                                                                                                                                   |                                 |                                                                   |           |           |     |             |            |     |     |
|----------------------------------|---------------------------------------------------------------------------------------------------------------------------------------------------|---------------------------------|-------------------------------------------------------------------|-----------|-----------|-----|-------------|------------|-----|-----|
| Rubio-Arias, 2019 <sup>125</sup> | <p>(normotensive participants)<br/>54-km run</p> <p>N=10<br/>100% male<br/>37.0±5.7 yrs<br/>CVD/CVRF na<br/>Experienced ultramarathon runners</p> | Troponin I (assay na)<br>URL na | 10                                                                | <b>56</b> |           |     | 10          | 10         |     |     |
|                                  |                                                                                                                                                   |                                 | 10                                                                | <b>15</b> |           |     | 10          | 10         |     |     |
| Sierra, 2019 <sup>126</sup>      | <p>N=81<br/>100% male<br/>39±1 yrs<br/>CVD/CVRF na<br/>Training volume 56±2.1 km/week of running</p>                                              | Marathon                        | Tnl (assay na)<br>URL na ng/L                                     | 20        | <b>90</b> |     |             | 30         | 20  |     |
| Marshall, 2020 <sup>28</sup>     | <p>N=10<br/>70% male<br/>34±7 yrs<br/>0% CVD self-reported and clinical assessment<br/>CVRF na<br/>Exercise experience na</p>                     | Low-intensity cycling, 60min    | cTnl (Abbot Laboratories)<br>URL 34 ng/L in men, 15 ng/L in women | 1.8       |           | 1.7 | <b>3.2</b>  |            | 1.9 | 1.8 |
|                                  |                                                                                                                                                   |                                 |                                                                   | 1.6       |           | 2.3 | <b>13.0</b> |            | 6.1 | 2.8 |
|                                  |                                                                                                                                                   |                                 |                                                                   | 2.8       |           | 3.5 | 6.9         | <b>8.1</b> |     | 3.8 |

Exercise experience na

|                                  |                                                                                                                                                                                                   |                                 |                                                             |     |      |      |             |      |      |
|----------------------------------|---------------------------------------------------------------------------------------------------------------------------------------------------------------------------------------------------|---------------------------------|-------------------------------------------------------------|-----|------|------|-------------|------|------|
| Li, 2020 <sup>113</sup>          | N=12<br>92% male<br>23.5±5.5 yrs<br>0% self-reported CVD/CVRF<br>Endurance runners, VO2 max 62.4±5.4 mL/kg/min                                                                                    | Intermittent exercise,<br>92min | cTnI (STAT assay from Abbott<br>Diagnostics)<br>URL 26 ng/L | 4.2 | 13.7 | 38.4 | <b>72.6</b> | 11.6 | 6.25 |
|                                  | N=12<br>92% male<br>23.5±5.5 yrs<br>0% self-reported CVD/CVRF<br>Endurance runners, VO2 max 62.4±5.4 mL/kg/min                                                                                    | Continuous exercise,<br>92min   | cTnI (STAT assay from Abbott<br>Diagnostics)<br>URL 26 ng/L | 4.5 | 15.9 | 36.6 | <b>94.9</b> | 21.1 | 15.5 |
| Aengevaeren, 2021 <sup>117</sup> | N=11<br>100% males<br>51 (50-56) Yrs<br>0% CVD/CVRF by clinical assessment<br>Previous marathon experience (2-25 marathons), 22 [16-38] average lifelong Metabolic Equivalent of Task-hours/week. | Marathon                        | cTnI (Singulex Clarity cTnI system)<br>URL 8.97 ng/L        | 2.7 |      | 14.5 | <b>23.6</b> | 8.4  |      |
|                                  | N=11<br>100% males<br>51 (50-56) Yrs<br>0% CVD/CVRF by clinical assessment<br>Previous marathon experience (2-25 marathons), 22 [16-38] average lifelong Metabolic Equivalent of Task-hours/week. | Marathon                        | cTnI (Siemens ADVIA Centaur TnI-Ultra)<br>URL 40 ng/L       | 0   |      | 43.5 | <b>57.0</b> | 3.0  |      |

---

cTnI, cardiac troponin I; na, not available from publication.

**Supplemental Table 3.** Studies investigating associations between cardiac troponin and changes in right ventricular cardiac function following exercise, ordered by race duration.

| Study                             | Study Population                                               | Type of exercise                                                                     | Functional indices                                                                             | cTn                                                                     | Association between cTn and cardiac function                                                                                                                         |
|-----------------------------------|----------------------------------------------------------------|--------------------------------------------------------------------------------------|------------------------------------------------------------------------------------------------|-------------------------------------------------------------------------|----------------------------------------------------------------------------------------------------------------------------------------------------------------------|
| Weippert et al 2016 <sup>29</sup> | 13 males, 26±3 years; no CVD.                                  | 1hr running (at 70% peak HR) and 17.5 min intermittent sprint exercise (90% peak HR) | TTE: no change in RV systolic function 30 min post-exercise. No strain analyses were reported. | cTnI; 1hr post-exercise: no significant change<br>4hrs post-exercise: ↑ | No change in RV systolic function                                                                                                                                    |
| Neilan et al 2006 <sup>25</sup>   | 41 males, 19 females, 41±11 years; no CVD.                     | Marathon (average time 245 min)                                                      | TTE: RV systolic function ↓ using strain analysis.                                             | cTnT; Directly post-exercise: ↑                                         | Reduction in RV endocardial velocities and strain correlated with the increase in cTnT (RV basal, $r=.68$ ; mid, $r=.70$ ; and apical, $r=.72$ ; $P<0.001$ for all). |
| Mousavi et al. 2009 <sup>68</sup> | 8 males, 6 females, 33±6 years; no CVRF, CVD or family history | Marathon (average time 245±68 minutes)                                               | TTE/CMR: RV systolic function ↓. No strain analyses were reported.                             | cTnT; directly and <3 days post-exercise: ↑                             | No association analyses were done                                                                                                                                    |

|                                       |                                                             |                                                     |                                                                               |                                                                                                                     |                                    |
|---------------------------------------|-------------------------------------------------------------|-----------------------------------------------------|-------------------------------------------------------------------------------|---------------------------------------------------------------------------------------------------------------------|------------------------------------|
|                                       | of coronary artery disease                                  |                                                     |                                                                               |                                                                                                                     |                                    |
| O' Hanlon et al. 2010 <sup>69</sup>   | 17 males, 34±7 years; no CVD, hypertension or diabetes.     | Marathon (average time 209±19 min)                  | TTE/CMR: No change in RV systolic function. No strain analyses were reported. | cTnI; immediately post-exercise: ↑, 6 hrs post-exercise at time of CMR: ↑↑                                          | No change in RV systolic function. |
| Gaudreault et al. 2013 <sup>127</sup> | 14 males, 6 females, 45±8 years; no CVD and no drug therapy | Marathon (average time 232±40 min)                  | CMR: RVEF ↓. No strain analyses were reported.                                | cTnI; immediately post-exercise ↑, 6-48 hrs post-exercise at time of CMR not significantly different from baseline. | Association with RV not reported.  |
| Aengevaeren et al. 2020 <sup>8</sup>  | 11 males, 51 [50-56] years; no CVD or CVRF                  | Marathon (median time 223 [208-274] min)            | CMR: no change in RVEF. No RV strain analyses were reported.                  | cTnI; ±1 hrs post-exercise: ↑, and 4±2 hrs post-exercise at time of CMR: ↑                                          | No change in RV systolic function. |
| Tahir et al. 2019 <sup>93</sup>       | 30 males, 45±10 years; no CVD, no CV medication             | Triathlon, multiple distances (average 3.3±2.7 hrs) | CMR: no change in RVEF. No strain analyses were done.                         | cTnI; 2.4±1.1 (range 1–5) hrs post-exercise at time of CMR: ↑                                                       | No change in RV systolic function. |

|                                        |                                                            |                                                                                                                                  |                                                           |                                                   |                                                                           |
|----------------------------------------|------------------------------------------------------------|----------------------------------------------------------------------------------------------------------------------------------|-----------------------------------------------------------|---------------------------------------------------|---------------------------------------------------------------------------|
| La Gerche et al.<br>2012 <sup>83</sup> | 36 males, 4 females, 37±8 years; no CVD, CVRF or symptoms. | Marathon (7, 179±30 min), Endurance triathlon (11, 324±25 min), Alpine cycling (9, 485±42 min), Ultra triathlon (13, 652±76 min) | TTE: RV systolic function ↓, both EF and strain analysis. | cTnI; immediately post-exercise at time of TTE: ↑ | Correlation between change in RVEF and post-race troponin (r=.49, P=.002) |
|----------------------------------------|------------------------------------------------------------|----------------------------------------------------------------------------------------------------------------------------------|-----------------------------------------------------------|---------------------------------------------------|---------------------------------------------------------------------------|

↑ means elevation. CVD, cardiovascular diseases; CVRF, cardiovascular risk factors; TTE, transthoracic echocardiogram; CMR, cardiovascular magnetic resonance; RV, right ventricular; EF, ejection fraction.
